# Supplementary material for: Improvement of L-asparaginase, an Anticancer Agent of Aspergillus arenarioides EAN603 in Submerged Fermentation Using a Radial Basis Function Neural Network with a Specific Genetic Algorithm (RBFNN-GA)
Source: MDPI journal article supplement (doi:10.3390/fermentation9030200), 2023-02-21
Supplement: s1 [file s1]

**Table S1.** Comparison between the experimental and prediction data for producing L-asparaginase by *A. arenarioides* EAN603 in SmF process with soybean as a production substrate.

|    | $x_1$ | $x_2$ | $x_3$ | $x_4$ | $y_a$  | $y_p$  |
|----|-------|-------|-------|-------|--------|--------|
| 1  | 34.00 | 8.50  | 7.00  | 10.00 | 123.00 | 145.69 |
| 2  | 34.00 | 8.50  | 5.00  | 10.00 | 115.10 | 110.36 |
| 3  | 34.00 | 5.50  | 5.00  | 2.50  | 65.25  | 47.81  |
| 4  | 31.00 | 7.00  | 6.00  | -1.25 | 1.00   | 10.09  |
| 5  | 31.00 | 7.00  | 6.00  | 6.25  | 87.00  | 81.82  |
| 6  | 34.00 | 8.50  | 7.00  | 2.50  | 108.87 | 93.52  |
| 7  | 31.00 | 7.00  | 6.00  | 6.25  | 88.06  | 81.82  |
| 8  | 31.00 | 7.00  | 8.00  | 6.25  | 143.00 | 126.26 |
| 9  | 31.00 | 7.00  | 6.00  | 6.25  | 80.90  | 81.82  |
| 10 | 31.00 | 7.00  | 4.00  | 6.25  | 72.12  | 81.13  |
| 11 | 28.00 | 5.50  | 5.00  | 10.00 | 104.04 | 110.40 |
| 12 | 28.00 | 5.50  | 5.00  | 2.50  | 81.46  | 75.48  |
| 13 | 34.00 | 8.50  | 5.00  | 2.50  | 0.48   | 15.01  |
| 14 | 31.00 | 7.00  | 6.00  | 6.25  | 84.07  | 81.82  |
| 15 | 31.00 | 7.00  | 6.00  | 13.75 | 114.00 | 97.17  |
| 16 | 31.00 | 4.00  | 6.00  | 6.25  | 50.00  | 45.21  |
| 17 | 28.00 | 8.50  | 5.00  | 10.00 | 131.17 | 124.54 |
| 18 | 28.00 | 5.50  | 7.00  | 10.00 | 74.82  | 77.01  |
| 19 | 25.00 | 7.00  | 6.00  | 6.25  | 148.32 | 154.78 |
| 20 | 31.00 | 7.00  | 6.00  | 6.25  | 78.70  | 81.82  |
| 21 | 31.00 | 10.00 | 6.00  | 6.25  | 81.00  | 78.05  |
| 22 | 28.00 | 8.50  | 7.00  | 2.50  | 105.13 | 109.02 |
| 23 | 28.00 | 5.50  | 7.00  | 2.50  | 89.53  | 85.28  |
| 24 | 28.00 | 8.50  | 5.00  | 2.50  | 56.95  | 47.73  |
| 25 | 31.00 | 7.00  | 6.00  | 6.25  | 72.18  | 81.82  |
| 26 | 28.00 | 8.50  | 7.00  | 10.00 | 134.19 | 142.64 |
| 27 | 34.00 | 5.50  | 7.00  | 2.50  | 51.47  | 74.82  |
| 28 | 37.00 | 7.00  | 6.00  | 6.25  | 144.34 | 130.15 |
| 29 | 34.00 | 5.50  | 5.00  | 10.00 | 88.44  | 101.27 |
| 30 | 34.00 | 5.50  | 7.00  | 10.00 | 84.86  | 85.10  |

Temperature ( $^{\circ}\text{C}$ ) ( $x_1$ ), pH ( $x_2$ ), incubation time (days) ( $x_3$ ) and soybean concentration ( $\text{gL}^{-1}$ ) ( $x_4$ ); actual results ( $y_a$ ), predicted results ( $y_p$ )

**Table S2.** Analysis of the variance (ANOVA) of the quadratic model for producing L-asparaginase by *A. arenarioides* EAN603 in SmF process with soybean.

|              | Sum of squares | df    | Mean squares | Coefficient estimate | SE   | F value | p value |
|--------------|----------------|-------|--------------|----------------------|------|---------|---------|
| <b>Model</b> | 34377.92       | 14.00 | 2455.57      | 81.82                | 6.23 | 10.56   | 0.00    |
| $x_1$        | 909.94         | 1.00  | 909.94       | -6.16                | 3.11 | 3.91    | 0.07    |
| $x_2$        | 1617.39        | 1.00  | 1617.39      | 8.21                 | 3.11 | 6.95    | 0.02    |
| $x_3$        | 3054.38        | 1.00  | 3054.38      | 11.28                | 3.11 | 13.13   | 0.00    |
| $x_4$        | 11374.78       | 1.00  | 11374.78     | 21.77                | 3.11 | 48.90   | 0.00    |
| $x_1x_2$     | 25.42          | 1.00  | 25.42        | -1.26                | 3.81 | 0.11    | 0.75    |
| $x_1x_3$     | 296.52         | 1.00  | 296.52       | 4.30                 | 3.81 | 1.27    | 0.28    |
| $x_1x_4$     | 343.91         | 1.00  | 343.91       | 4.64                 | 3.81 | 1.48    | 0.24    |
| $x_2x_3$     | 2652.22        | 1.00  | 2652.22      | 12.87                | 3.81 | 11.40   | 0.00    |
| $x_2x_4$     | 1755.17        | 1.00  | 1755.17      | 10.47                | 3.81 | 7.55    | 0.01    |
| $x_3x_4$     | 1865.14        | 1.00  | 1865.14      | -10.80               | 3.81 | 8.02    | 0.01    |
| $x_1^2$      | 6304.75        | 1.00  | 6304.75      | 15.16                | 2.91 | 27.10   | 0.00    |

|             |          |       |         |       |      |      |      |
|-------------|----------|-------|---------|-------|------|------|------|
| $x_2^2$     | 698.48   | 1.00  | 698.48  | -5.05 | 2.91 | 3.00 | 0.10 |
| $x_3^2$     | 820.28   | 1.00  | 820.28  | 5.47  | 2.91 | 3.53 | 0.08 |
| $x_4^2$     | 1361.85  | 1.00  | 1361.85 | -7.05 | 2.91 | 5.85 | 0.03 |
| Residual    | 3489.33  | 15.00 | 232.62  |       |      |      |      |
| Lack of Fit | 3314.99  | 10.00 | 331.50  |       |      | 9.51 | 0.01 |
| Pure Error  | 174.34   | 5.00  | 34.87   |       |      |      |      |
| Cor Total   | 37867.25 | 29.00 |         |       |      |      |      |

$R^2=0.9079$ ; Temperature ( $^{\circ}\text{C}$ ) ( $x_1$ ), pH ( $x_2$ ), incubation time (days) ( $x_3$ ) and soybean concentration ( $\text{g L}^{-1}$ ) ( $x_4$ );

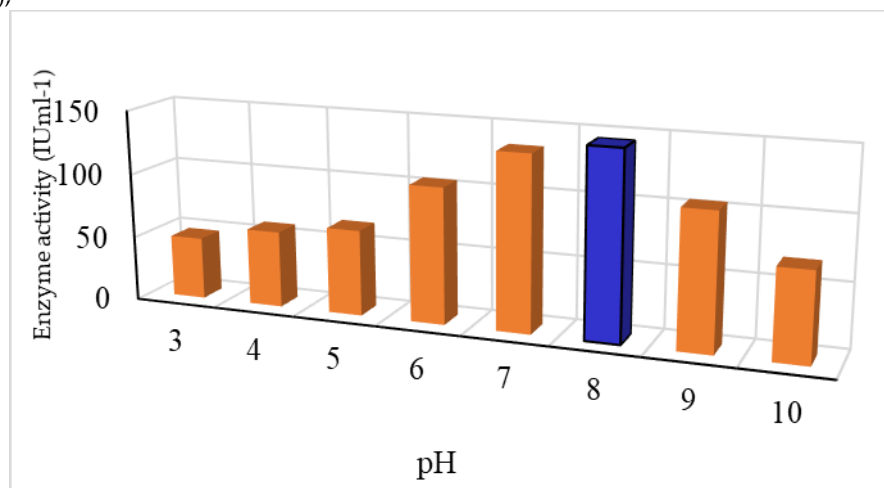

A

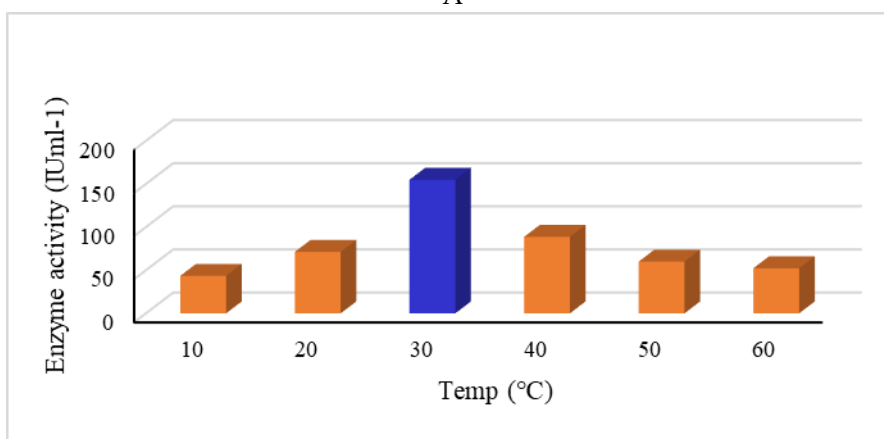

B

**Figure S1.** Enzyme stability as a response for pH (A); and Temperature (B).
